# Supplementary material
Source: PubMed Central journal article supplement (PMC4227559)
Supplement: pr500656z_si_001.pdf [file pr500656z_si_001.pdf]

## **Supplemental data for**

### **Dysbindin-associated proteome in the synaptosome of mouse brain**

Meng-Hsuan J. Han<sup>1,2</sup>, Zhonghua Hu<sup>1</sup>, Cai Yun Chen<sup>1</sup>, Yong Chen<sup>3</sup>, Marjan Gucek<sup>3</sup>, Zheng Li<sup>1</sup>, Sanford P. Markey<sup>1\*</sup>

<sup>1</sup>National Institute of Mental Health, Bethesda, MD 20892; <sup>2</sup>Children's National Medical Center, Washington, DC 20010; <sup>3</sup>National Heart, Lung, and Blood Institute, Bethesda, MD 20892

## **FIGURE LEGENDS**

**Supplemental Fig. S1.** The second network (Cell-mediated Immune Response, Cellular Development, Cellular Function and Maintenance) identified by Ingenuity Pathway analysis of the 48 identified proteins. Colored nodes indicate the identified proteins used in the pathway analysis.

**Supplemental Table S1.** The 47 putative dysbindin-associated proteins were grouped into seven categories with regard to their functions based on the information from UniProt, NCBI and/or Gene Ontology databases.

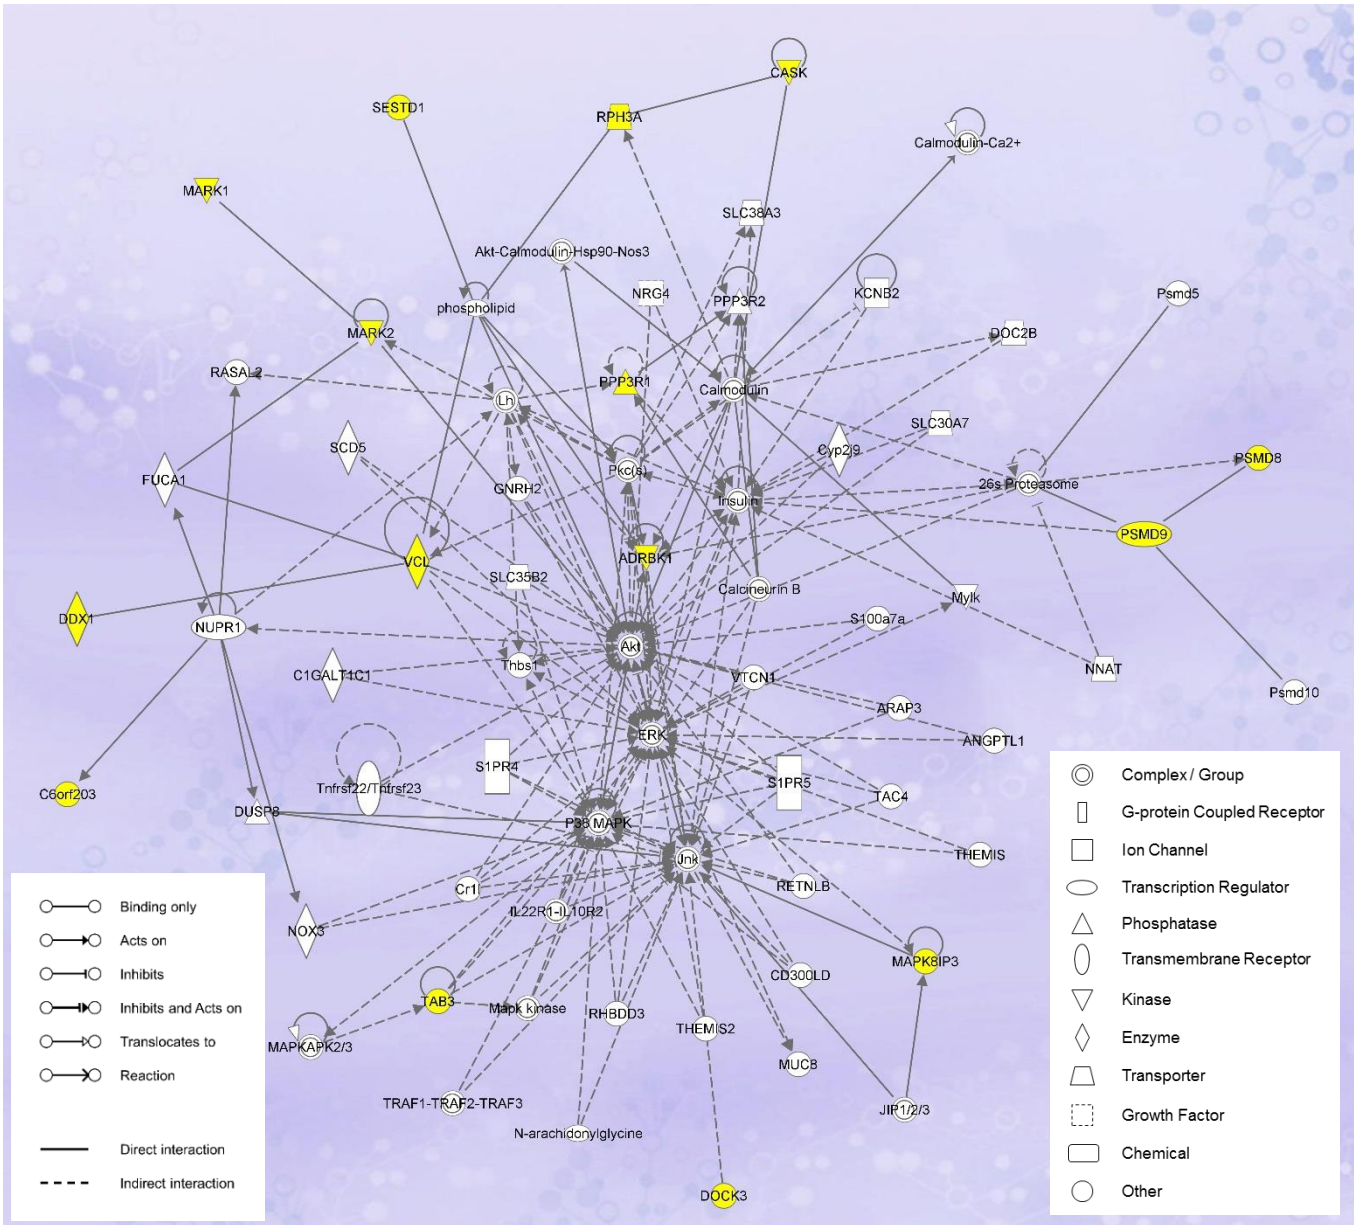

| Function                    | #  | Protein name                                                           | Gene symbol (Hu, M) |
|-----------------------------|----|------------------------------------------------------------------------|---------------------|
| Trafficking/transport       | 1  | SNARE-associated protein Snapin                                        | BLOC1S7, Bloc1s7    |
|                             | 2  | Protein Muted                                                          | BLOC1S5, Bloc1s5    |
|                             | 3  | Protein cappuccino                                                     | BLOC1S4, Bloc1s4    |
|                             | 4  | Biogenesis of lysosome-related organelles complex 1 subunit 1          | BLOC1S1, Bloc1s1    |
|                             | 5  | Biogenesis of lysosome-related organelles complex 1 subunit 2          | BLOC1S2, Bloc1s2    |
|                             | 6  | Biogenesis of lysosome-related organelles complex 1 subunit 3          | BLOC1S3, Bloc1s3    |
|                             | 7  | Pallidin                                                               | BLOC1S6, Bloc1s6    |
|                             | 8  | AP-3 complex subunit beta-1                                            | AP3B1, Ap3b1        |
|                             | 9  | Exocyst complex component 3                                            | EXOC3, Exoc3        |
|                             | 10 | Exocyst complex component 4                                            | EXOC4, Exoc4        |
|                             | 11 | Calnexin                                                               | CANX, Canx          |
|                             | 12 | Vacuolar protein sorting-associated protein 16 homolog                 | VPS16, Vps16        |
|                             | 13 | Syntaxin-1B                                                            | STX1B, Stx1b        |
|                             | 14 | Carbonic anhydrase 2                                                   | CA2, Ca2            |
|                             | 15 | Rabphilin-3A                                                           | RPH3A, Rph3a        |
|                             | 16 | Peripheral plasma membrane protein CASK                                | CASK, Cask          |
|                             | 17 | Neurobeachin                                                           | NBEA, Nbea          |
|                             | 18 | SEC14 domain and spectrin repeat-containing protein 1                  | SESTD1, Sestd1      |
|                             | 19 | V-type proton ATPase subunit D                                         | ATP6V1D, Atp6v1d    |
|                             | 20 | ATP synthase subunit f, mitochondrial                                  | ATP5J2, Atp5j2      |
|                             | 21 | C-Jun-amino-terminal kinase-interacting protein 3                      | MAPK8IP3, Mapk8ip3  |
|                             | 22 | Dynamin-3                                                              | DNM3, Dnm3          |
|                             | 23 | Protein fat-free homolog                                               | VPS51, Vps51        |
| Signaling                   | 1  | Carbonic anhydrase 2                                                   | CA2, Ca2            |
|                             | 2  | C-Jun-amino-terminal kinase-interacting protein 3                      | MAPK8IP3, Mapk8ip3  |
|                             | 3  | Calcineurin subunit B type 1                                           | PPP3R1, Ppp3r1      |
|                             | 4  | TGF-beta-activated kinase 1 and MAP3K7-binding protein 3               | TAB3, Tab3          |
|                             | 5  | Serine/threonine-protein kinase MARK1                                  | MARK1, Mark1        |
|                             | 6  | Dedicator of cytokinesis protein 3                                     | DOCK3, Dock3        |
|                             | 7  | Serine/threonine-protein kinase MARK2                                  | MARK2, Mark2        |
|                             | 8  | Beta-adrenergic receptor kinase 1                                      | ADRBK1, Adrbk1      |
|                             | 9  | Hyccin                                                                 | FAM126A, Fam126a    |
|                             | 10 | Elongation factor 1-delta                                              | EEF1D, Eef1d        |
|                             | 11 | Serine/threonine-protein phosphatase 2A catalytic subunit beta isoform | PPP2CB, Ppp2cb      |
| Ubiquitin-proteasome system | 1  | Proteasome subunit alpha type-4                                        | PSMA4, Psm4         |
|                             | 2  | E3 ubiquitin-protein ligase HUWE1                                      | HUWE1, Huwe1        |
|                             | 3  | 26S proteasome non-ATPase regulatory subunit 8                         | PSMD8, Psm8         |
|                             | 4  | 26S proteasome non-ATPase regulatory subunit 9                         | PSMD9, Psm9         |
| Transcription regulation    | 1  | Elongation factor 1-delta                                              | EEF1D, Eef1d        |
|                             | 2  | Peripheral plasma membrane protein CASK                                | CASK, Cask          |
|                             | 3  | ATP-dependent RNA helicase DDX1                                        | DDX1, Ddx1          |
|                             | 4  | Catenin delta-2                                                        | CTNND2, Ctnnd2      |
| Cell adhesion               | 1  | Peripheral plasma membrane protein CASK                                | CASK, Cask          |
|                             | 2  | Catenin delta-2                                                        | CTNND2, Ctnnd2      |
|                             | 3  | Vinculin                                                               | VCL, Vcl            |
| Lipid metabolism            | 1  | CDP-diacylglycerol--inositol 3-phosphatidyltransferase                 | CDIPT, Cdipt        |
|                             | 2  | 1-acyl-sn-glycerol-3-phosphate acyltransferase gamma                   | AGPAT3, Agpat3      |
| Others/unknown              | 1  | WD repeat-containing protein 11                                        | WDR11, Wdr11        |
|                             | 2  | Protein FAM91A1                                                        | FAM91A1, Fam91a1    |
|                             | 3  | Transgelin-2                                                           | TAGLN2, Tagln2      |
|                             | 4  | Myelin proteolipid protein                                             | PLP1, Plp1          |
|                             | 5  | Uncharacterized protein C6orf203 homolog                               | C6orf203            |
|                             | 6  | 39S ribosomal protein L41, mitochondrial                               | MRPL41, Mrpl41      |
